# Supplementary material for: Antibacterial and Antiproliferative Activities of Plumericin, an Iridoid Isolated fromMomordica charantiaVine
Source: Hindawi journal article supplement (doi:10.1155/2015/823178), 2015-01-01

## Appendix : Supporting information

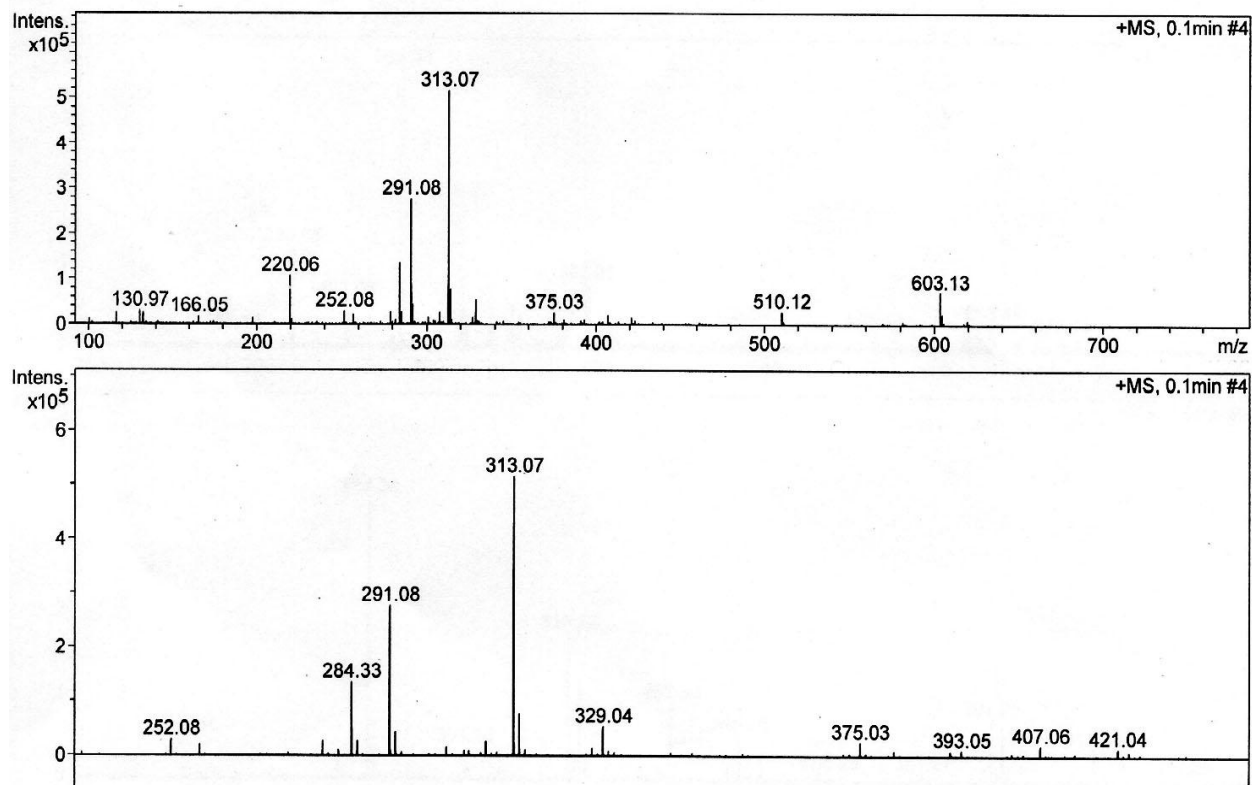

FIGURE A-1: ESI-MS spectrum of compound 1.

NMR spectrum of MH5 (29 mg) in CDCl<sub>3</sub> 19-09-13

Dept135

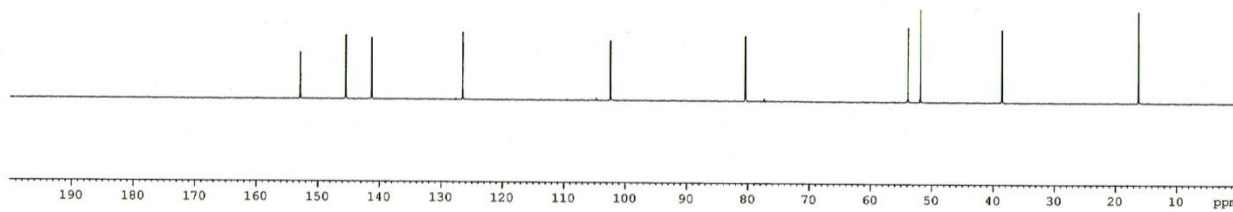

dept90

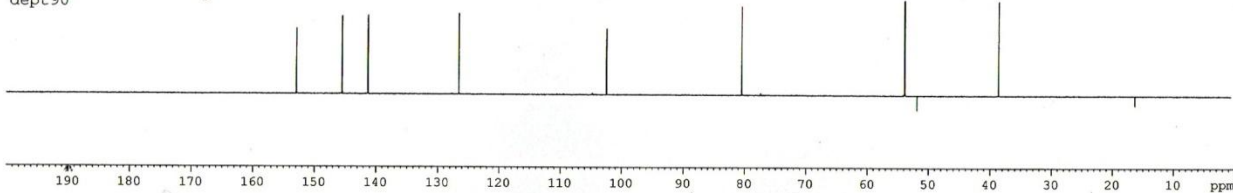

13C

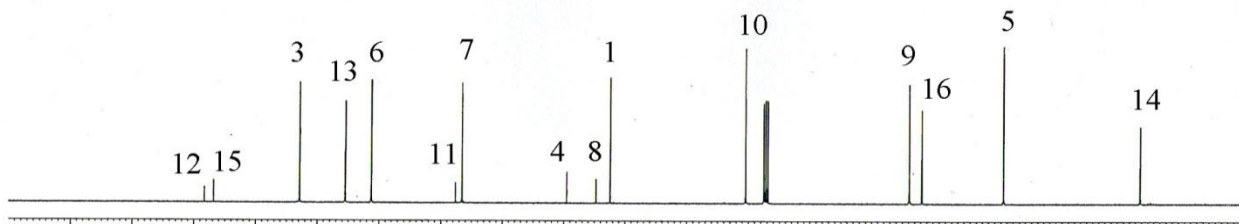

FIGURE A-2: The DEPT 90 and DEPT 135 spectrum of isolated compound 1.

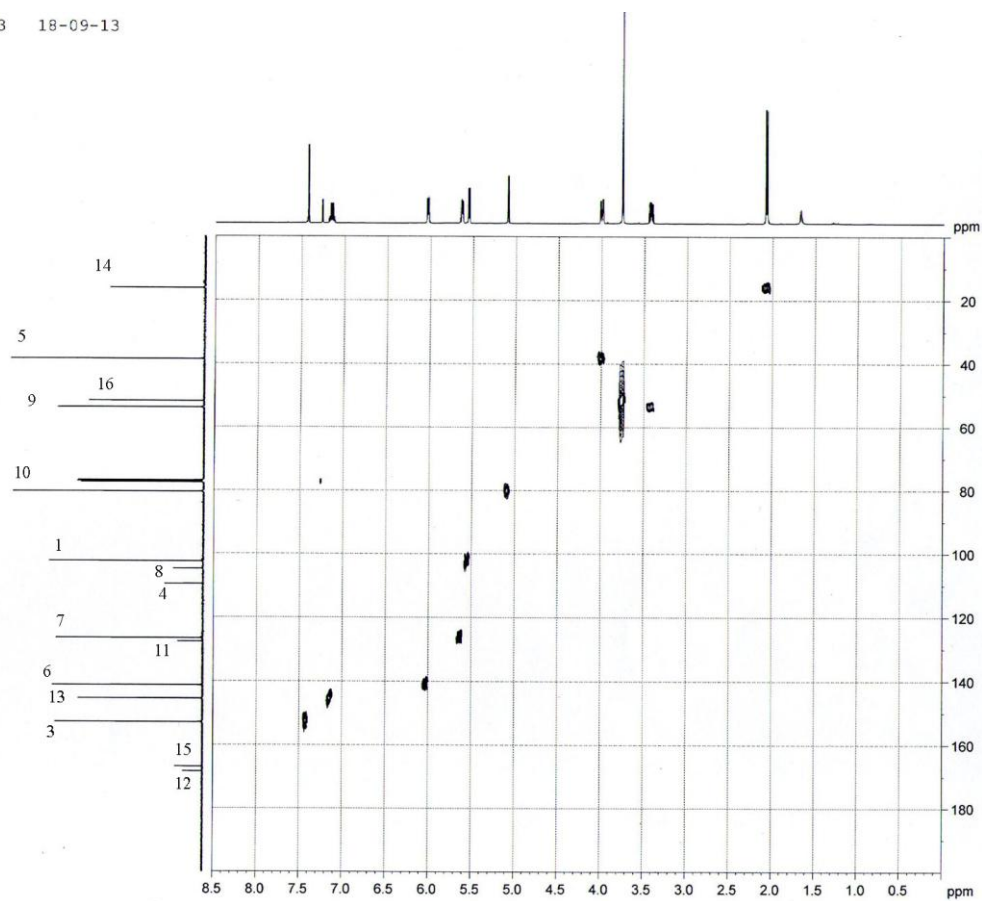

FIGURE A-3: HMQC spectrum of compound 1 in  $\text{CDCl}_3$

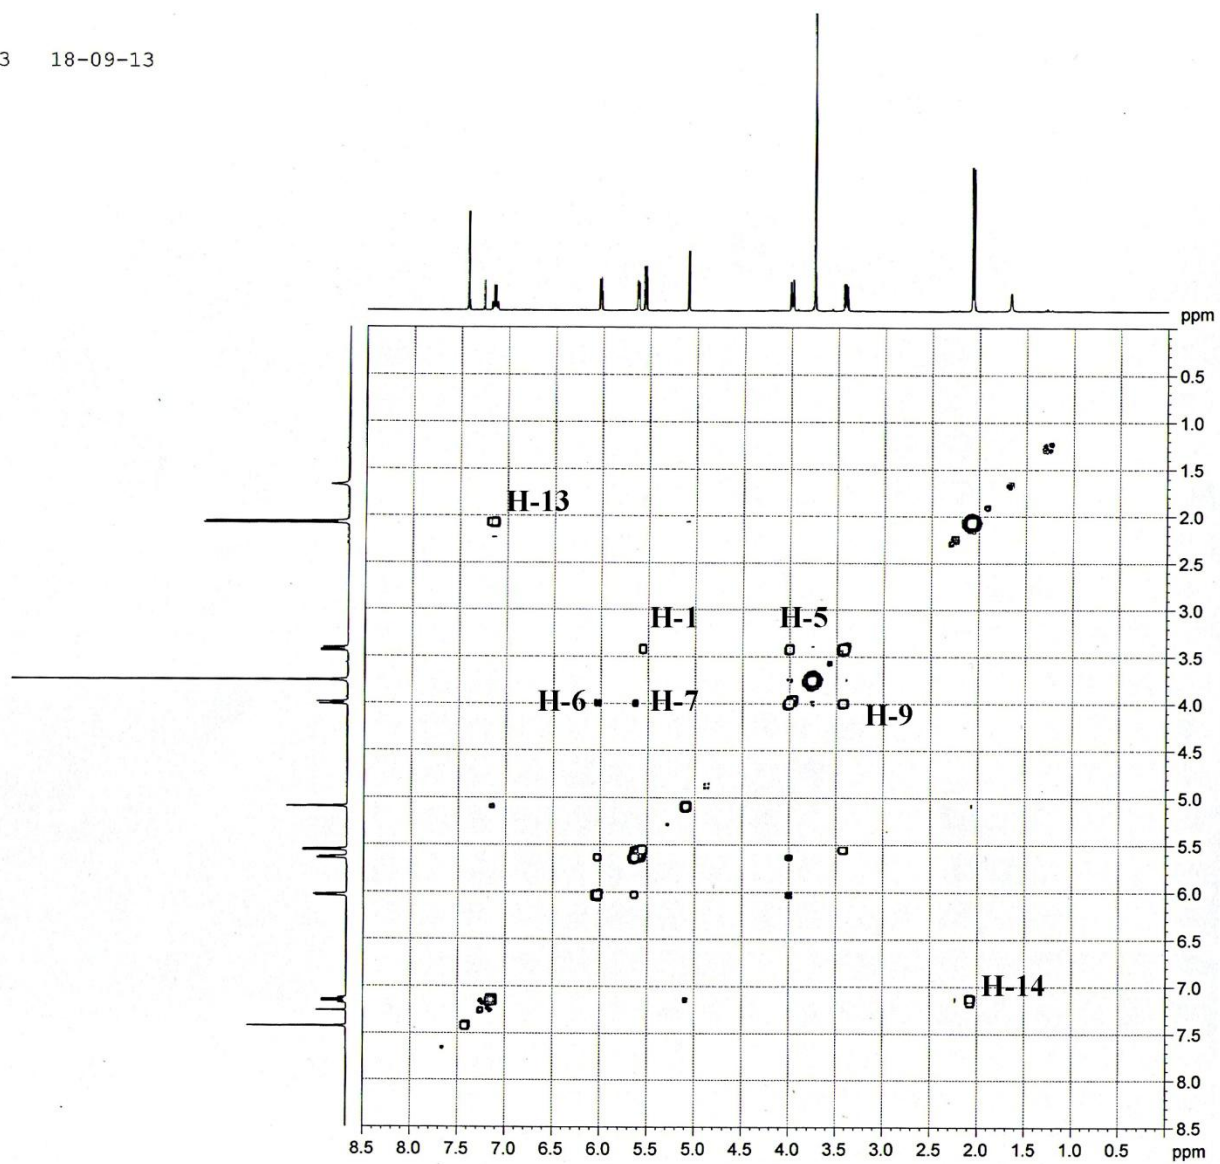

FIGURE A-4: H-H COSY spectrum of compound 1 in CDCl<sub>3</sub>

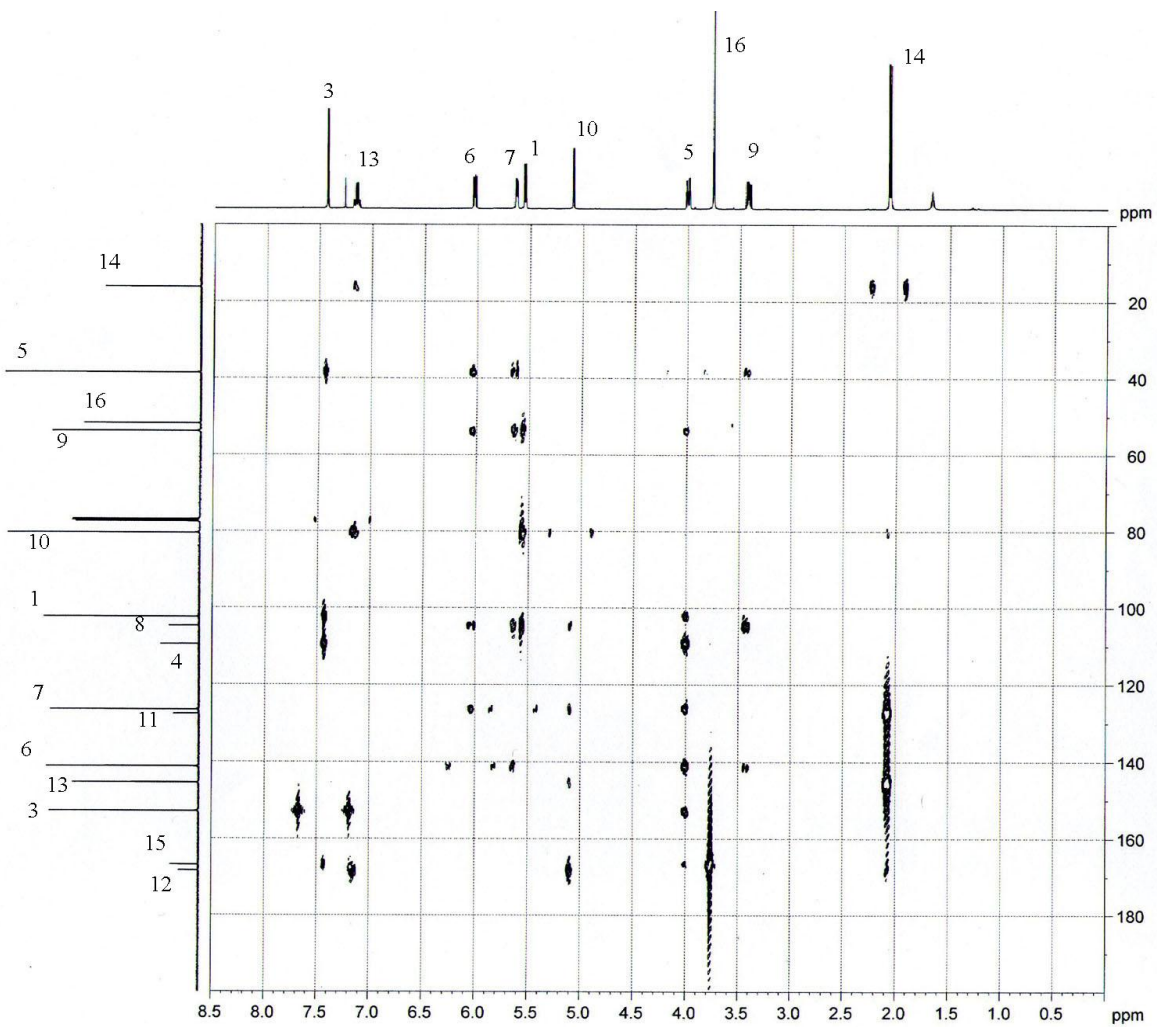

FIGURE A-5: HMBC experiment of compound 1.

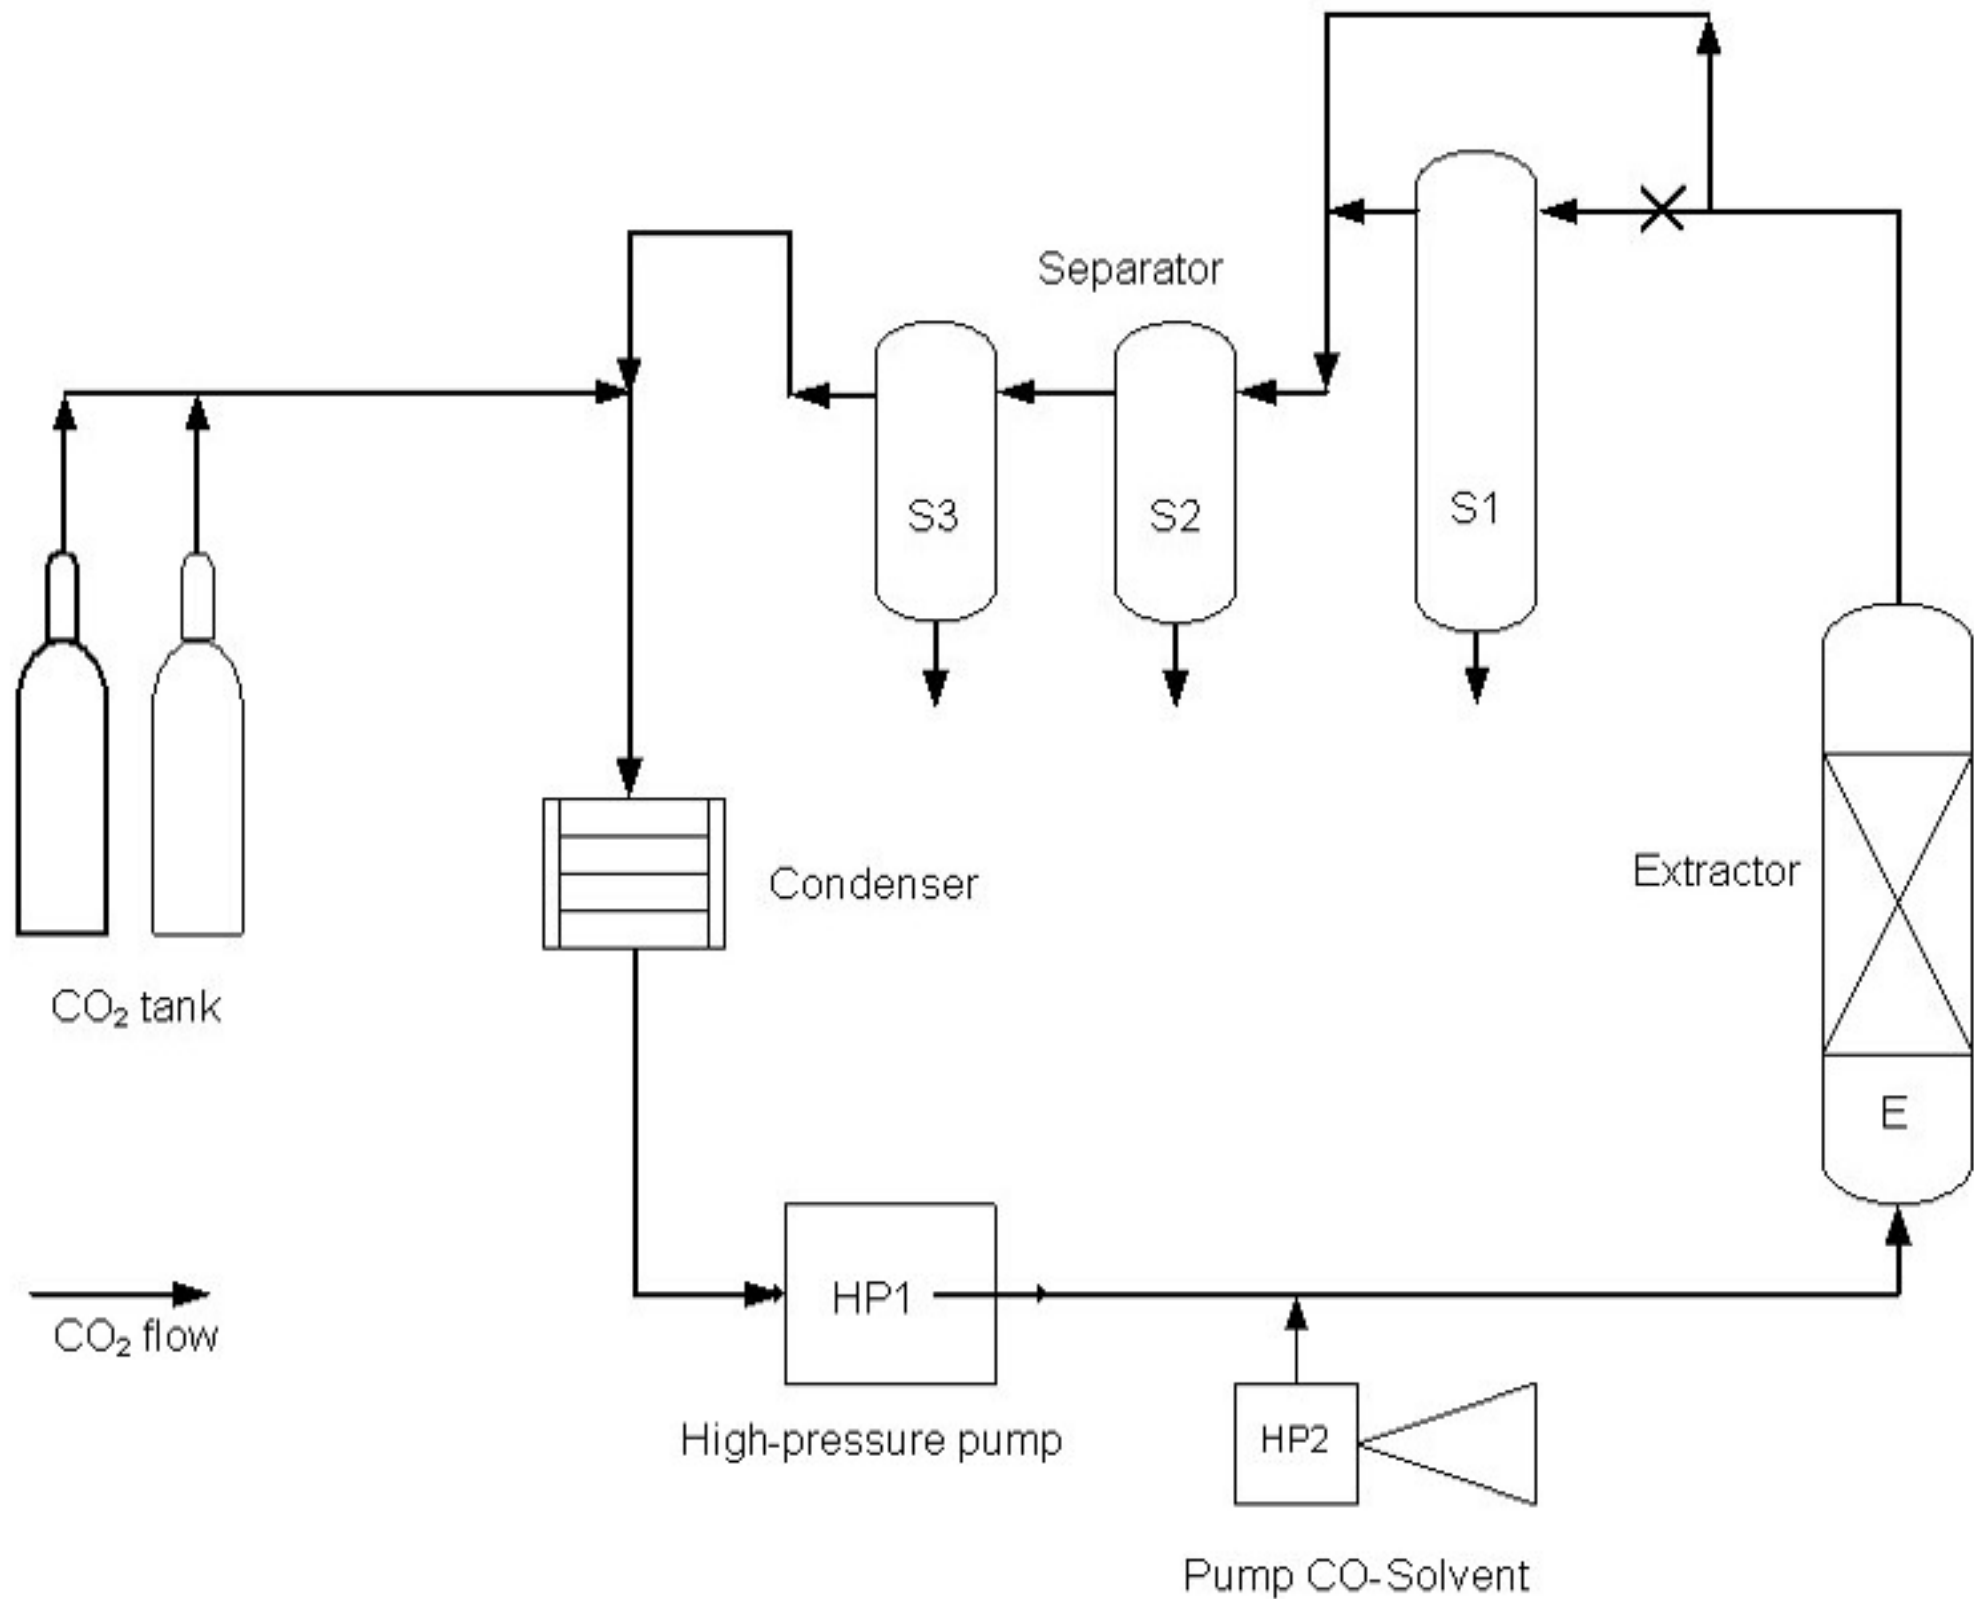

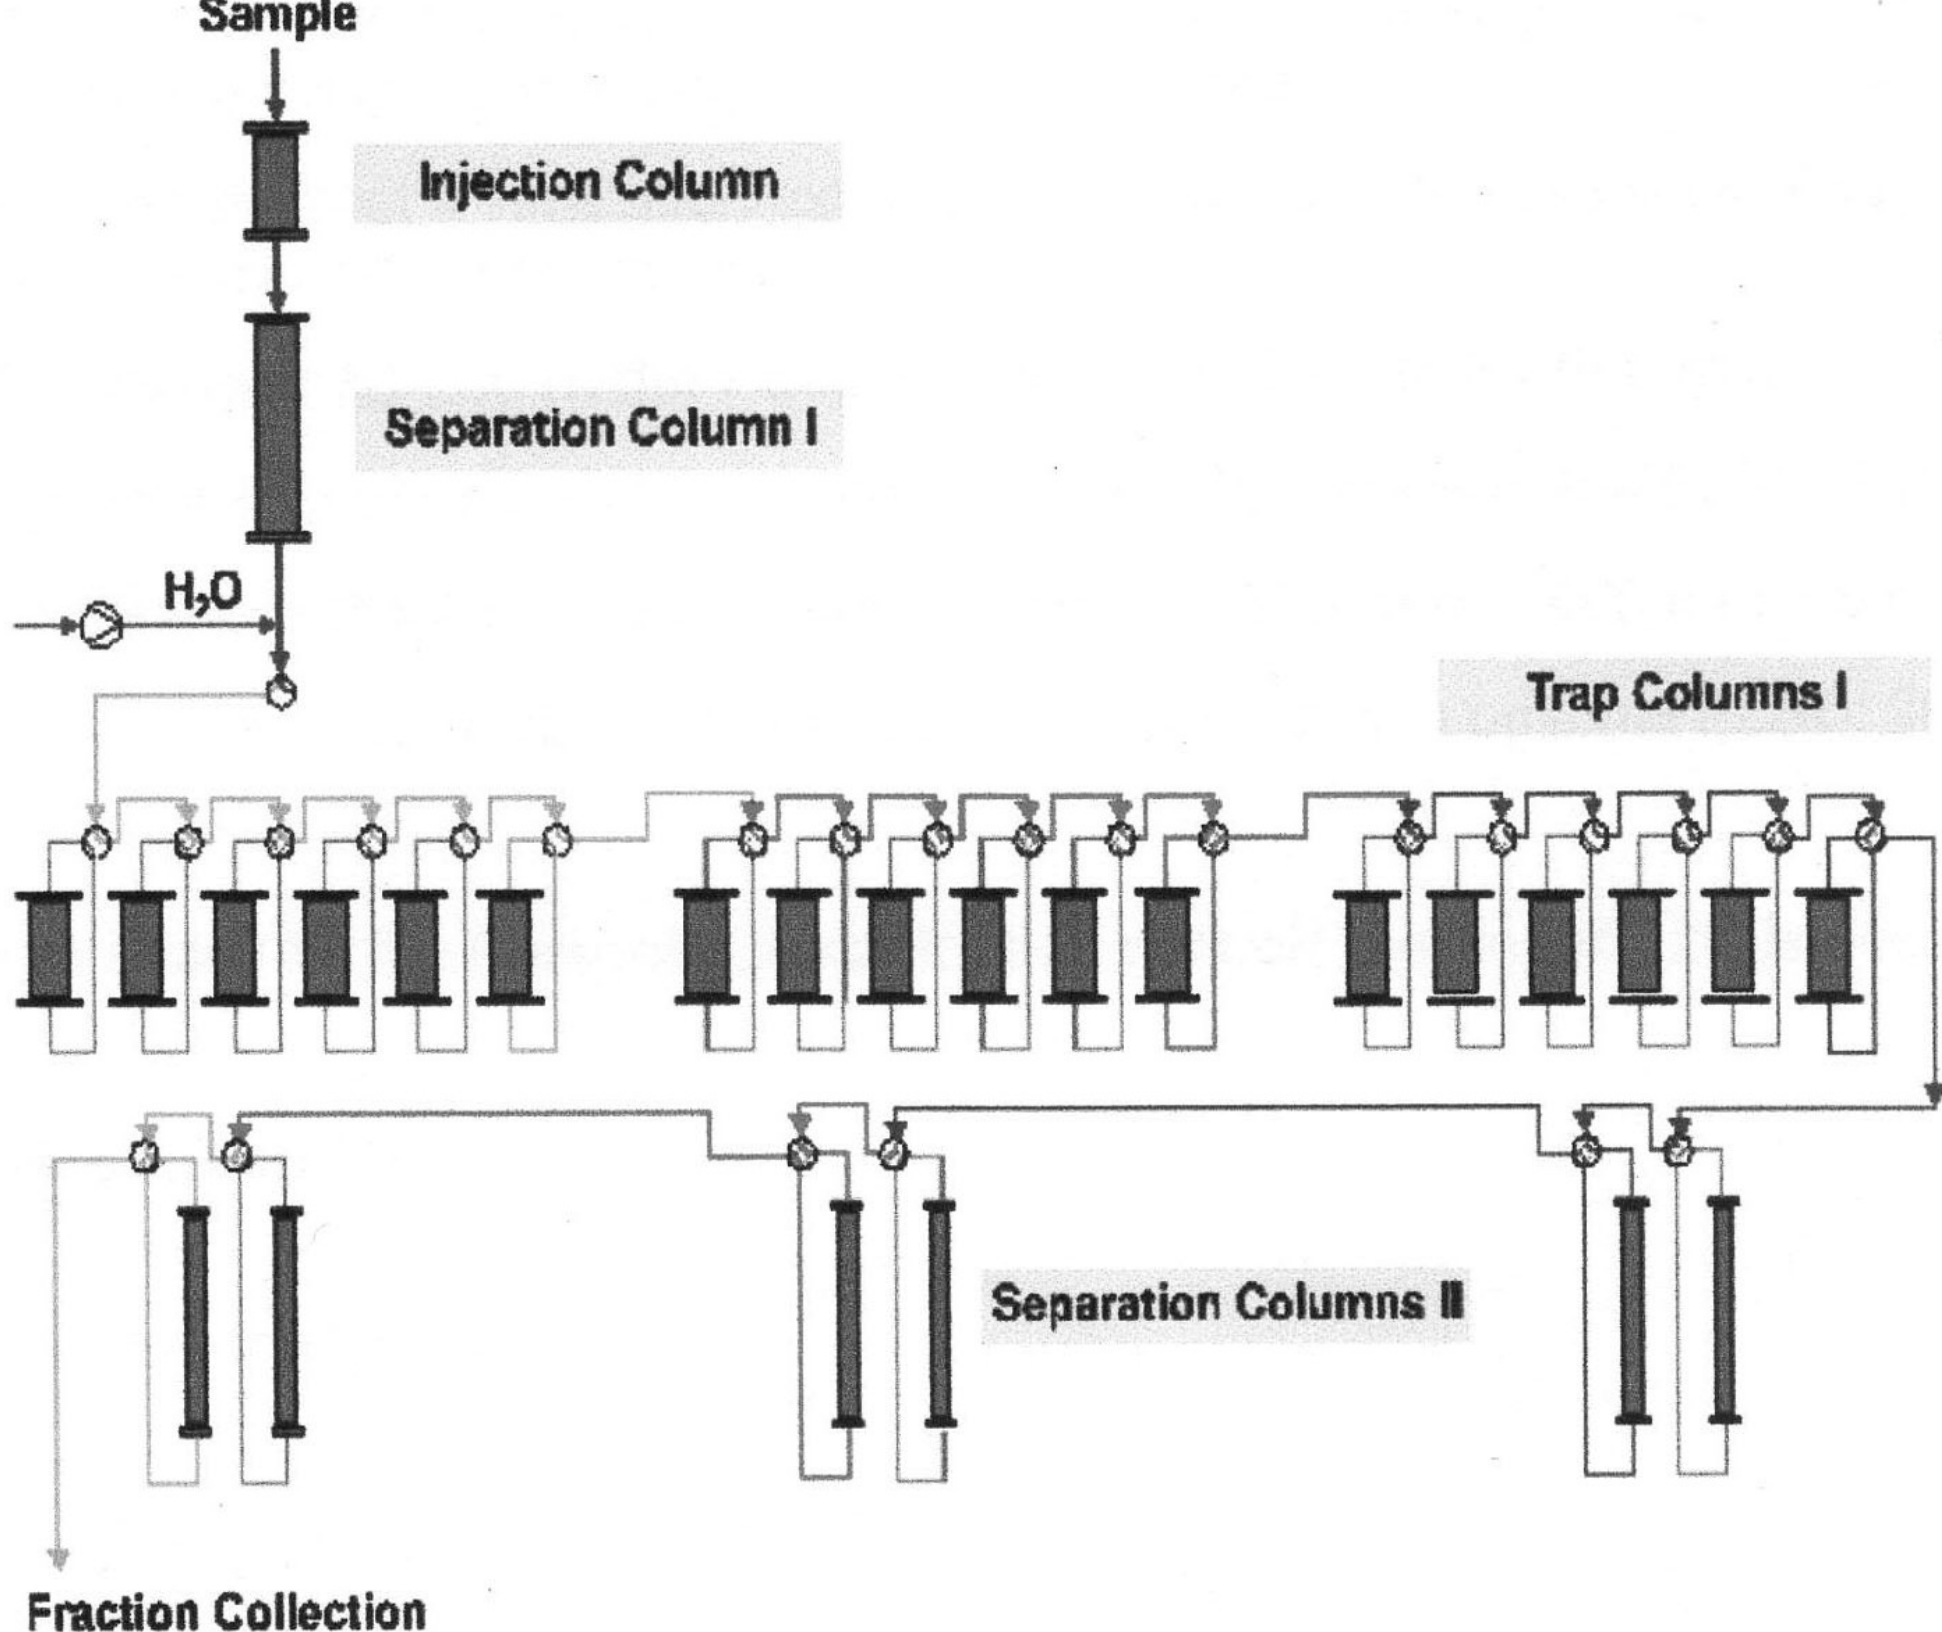

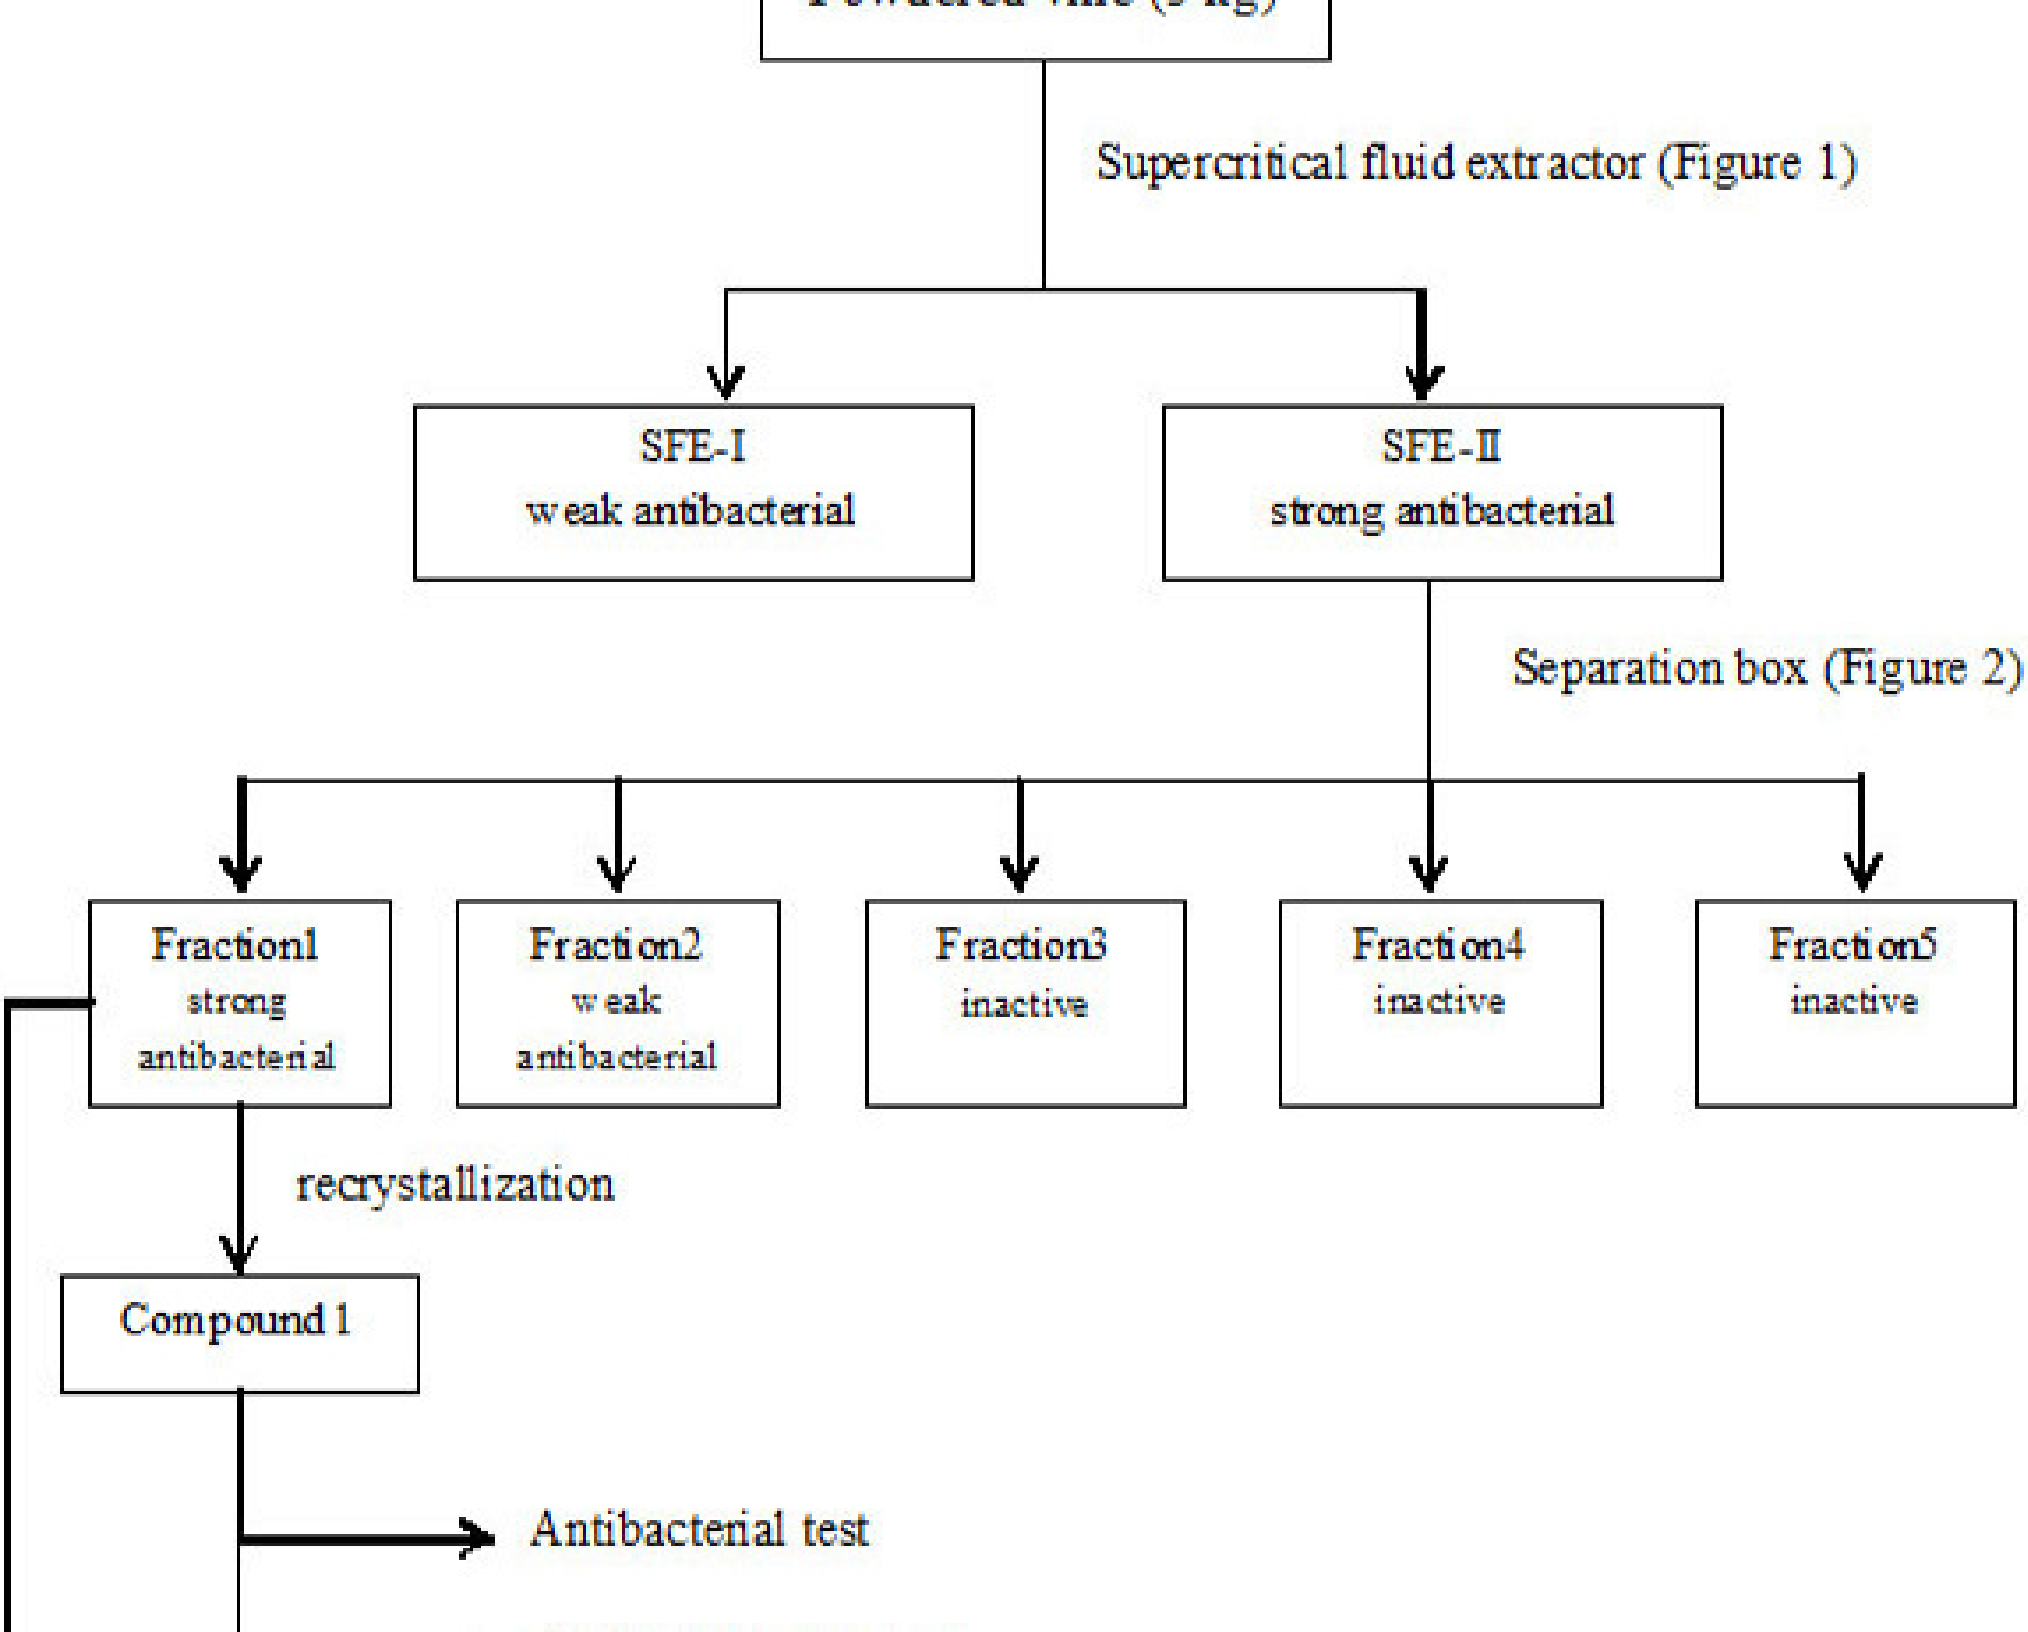



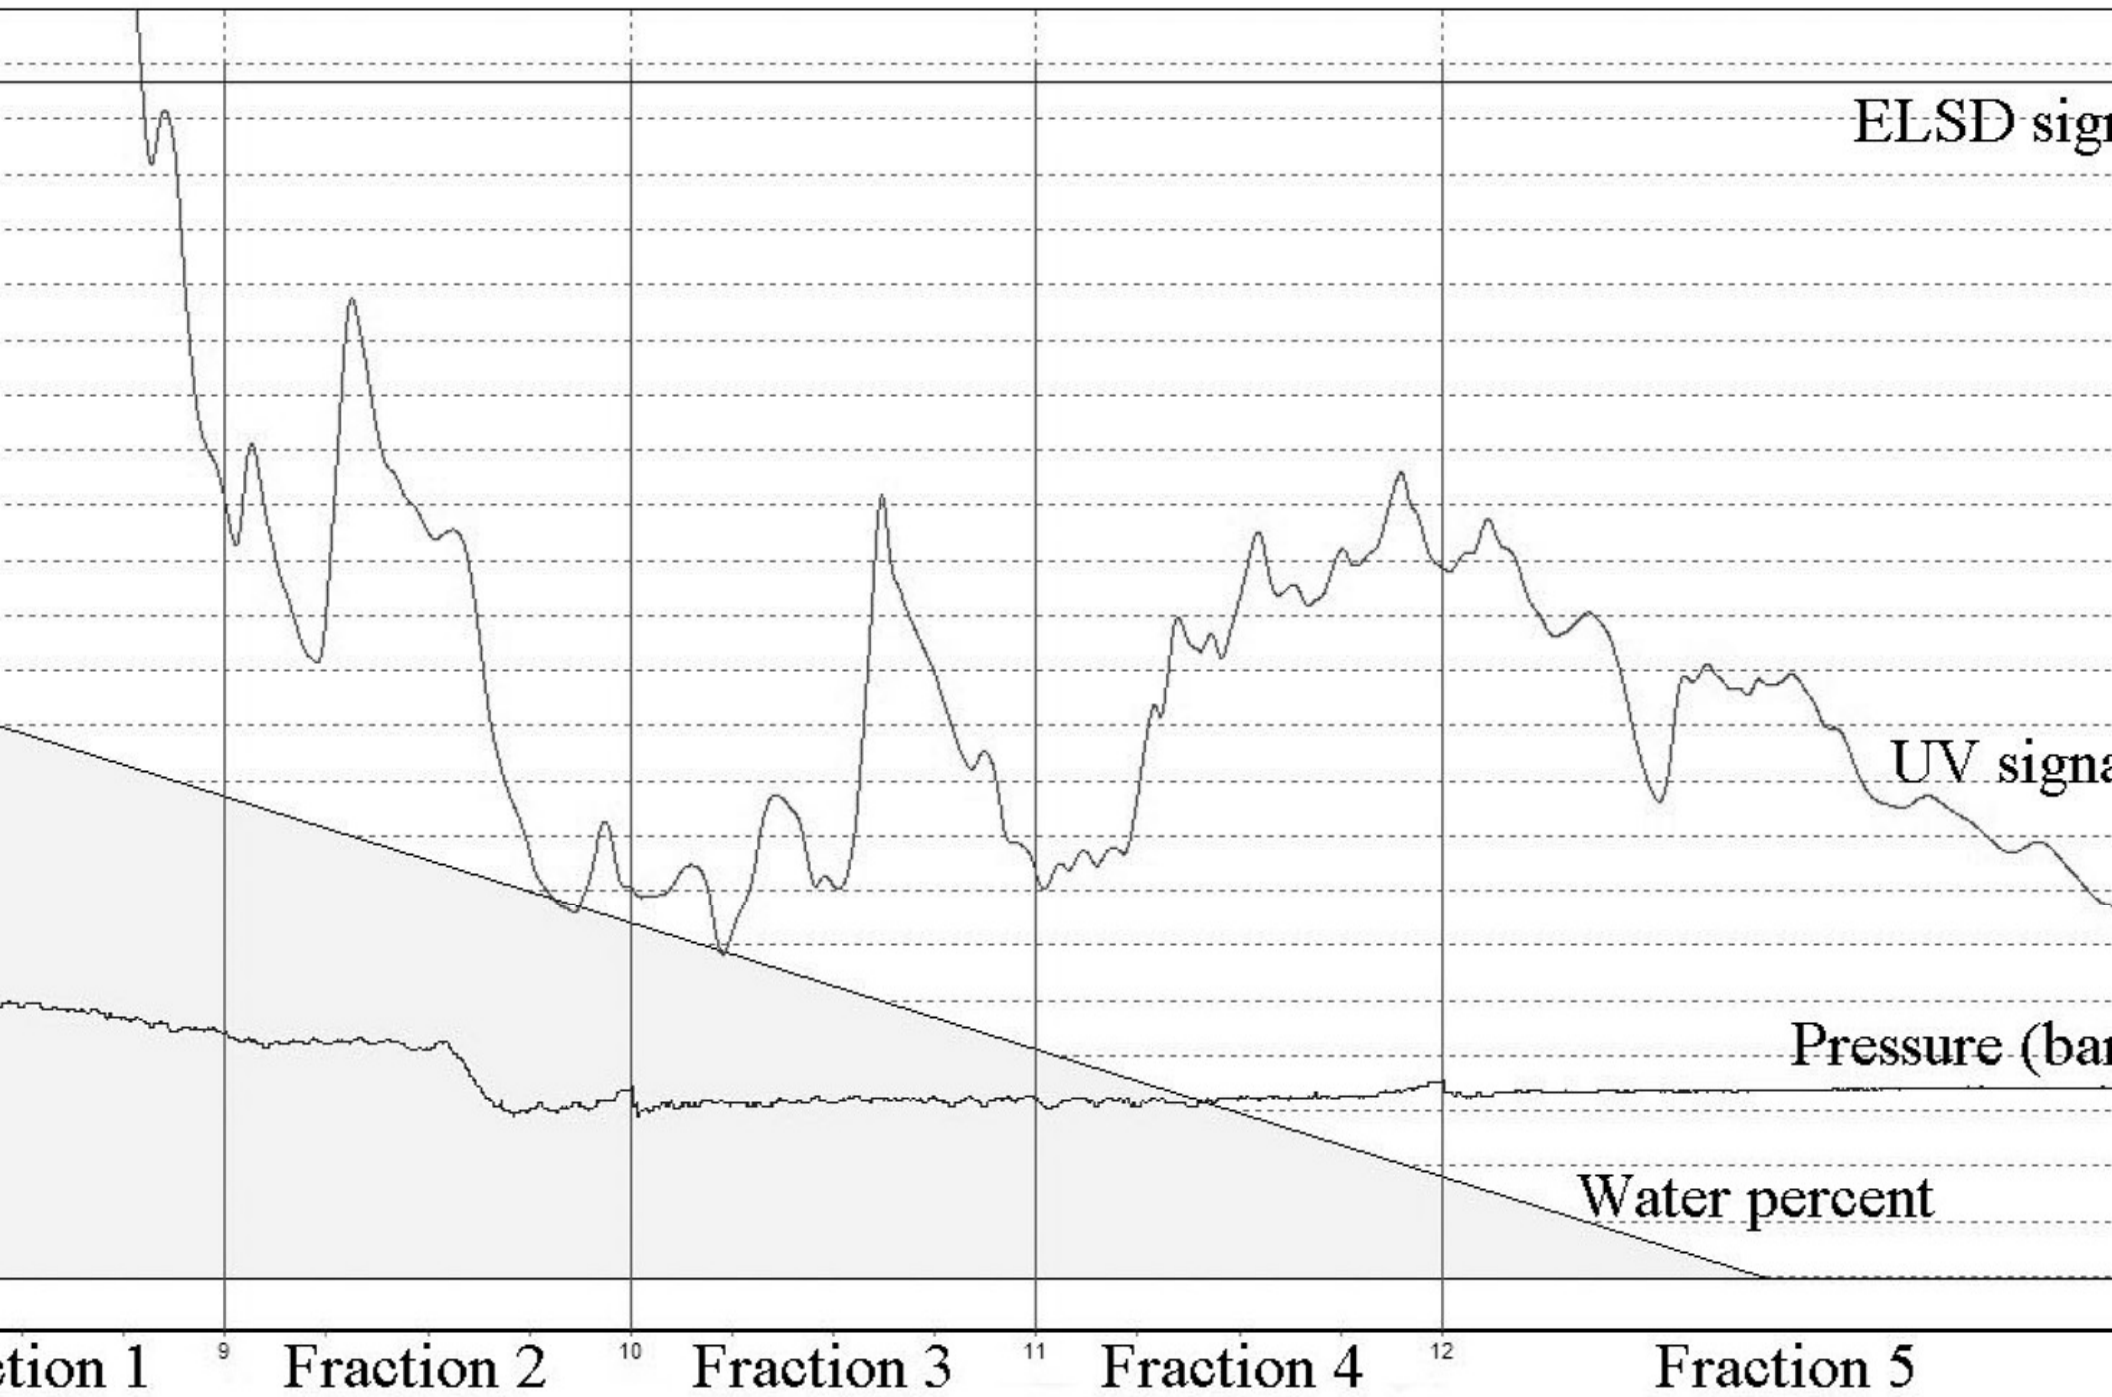



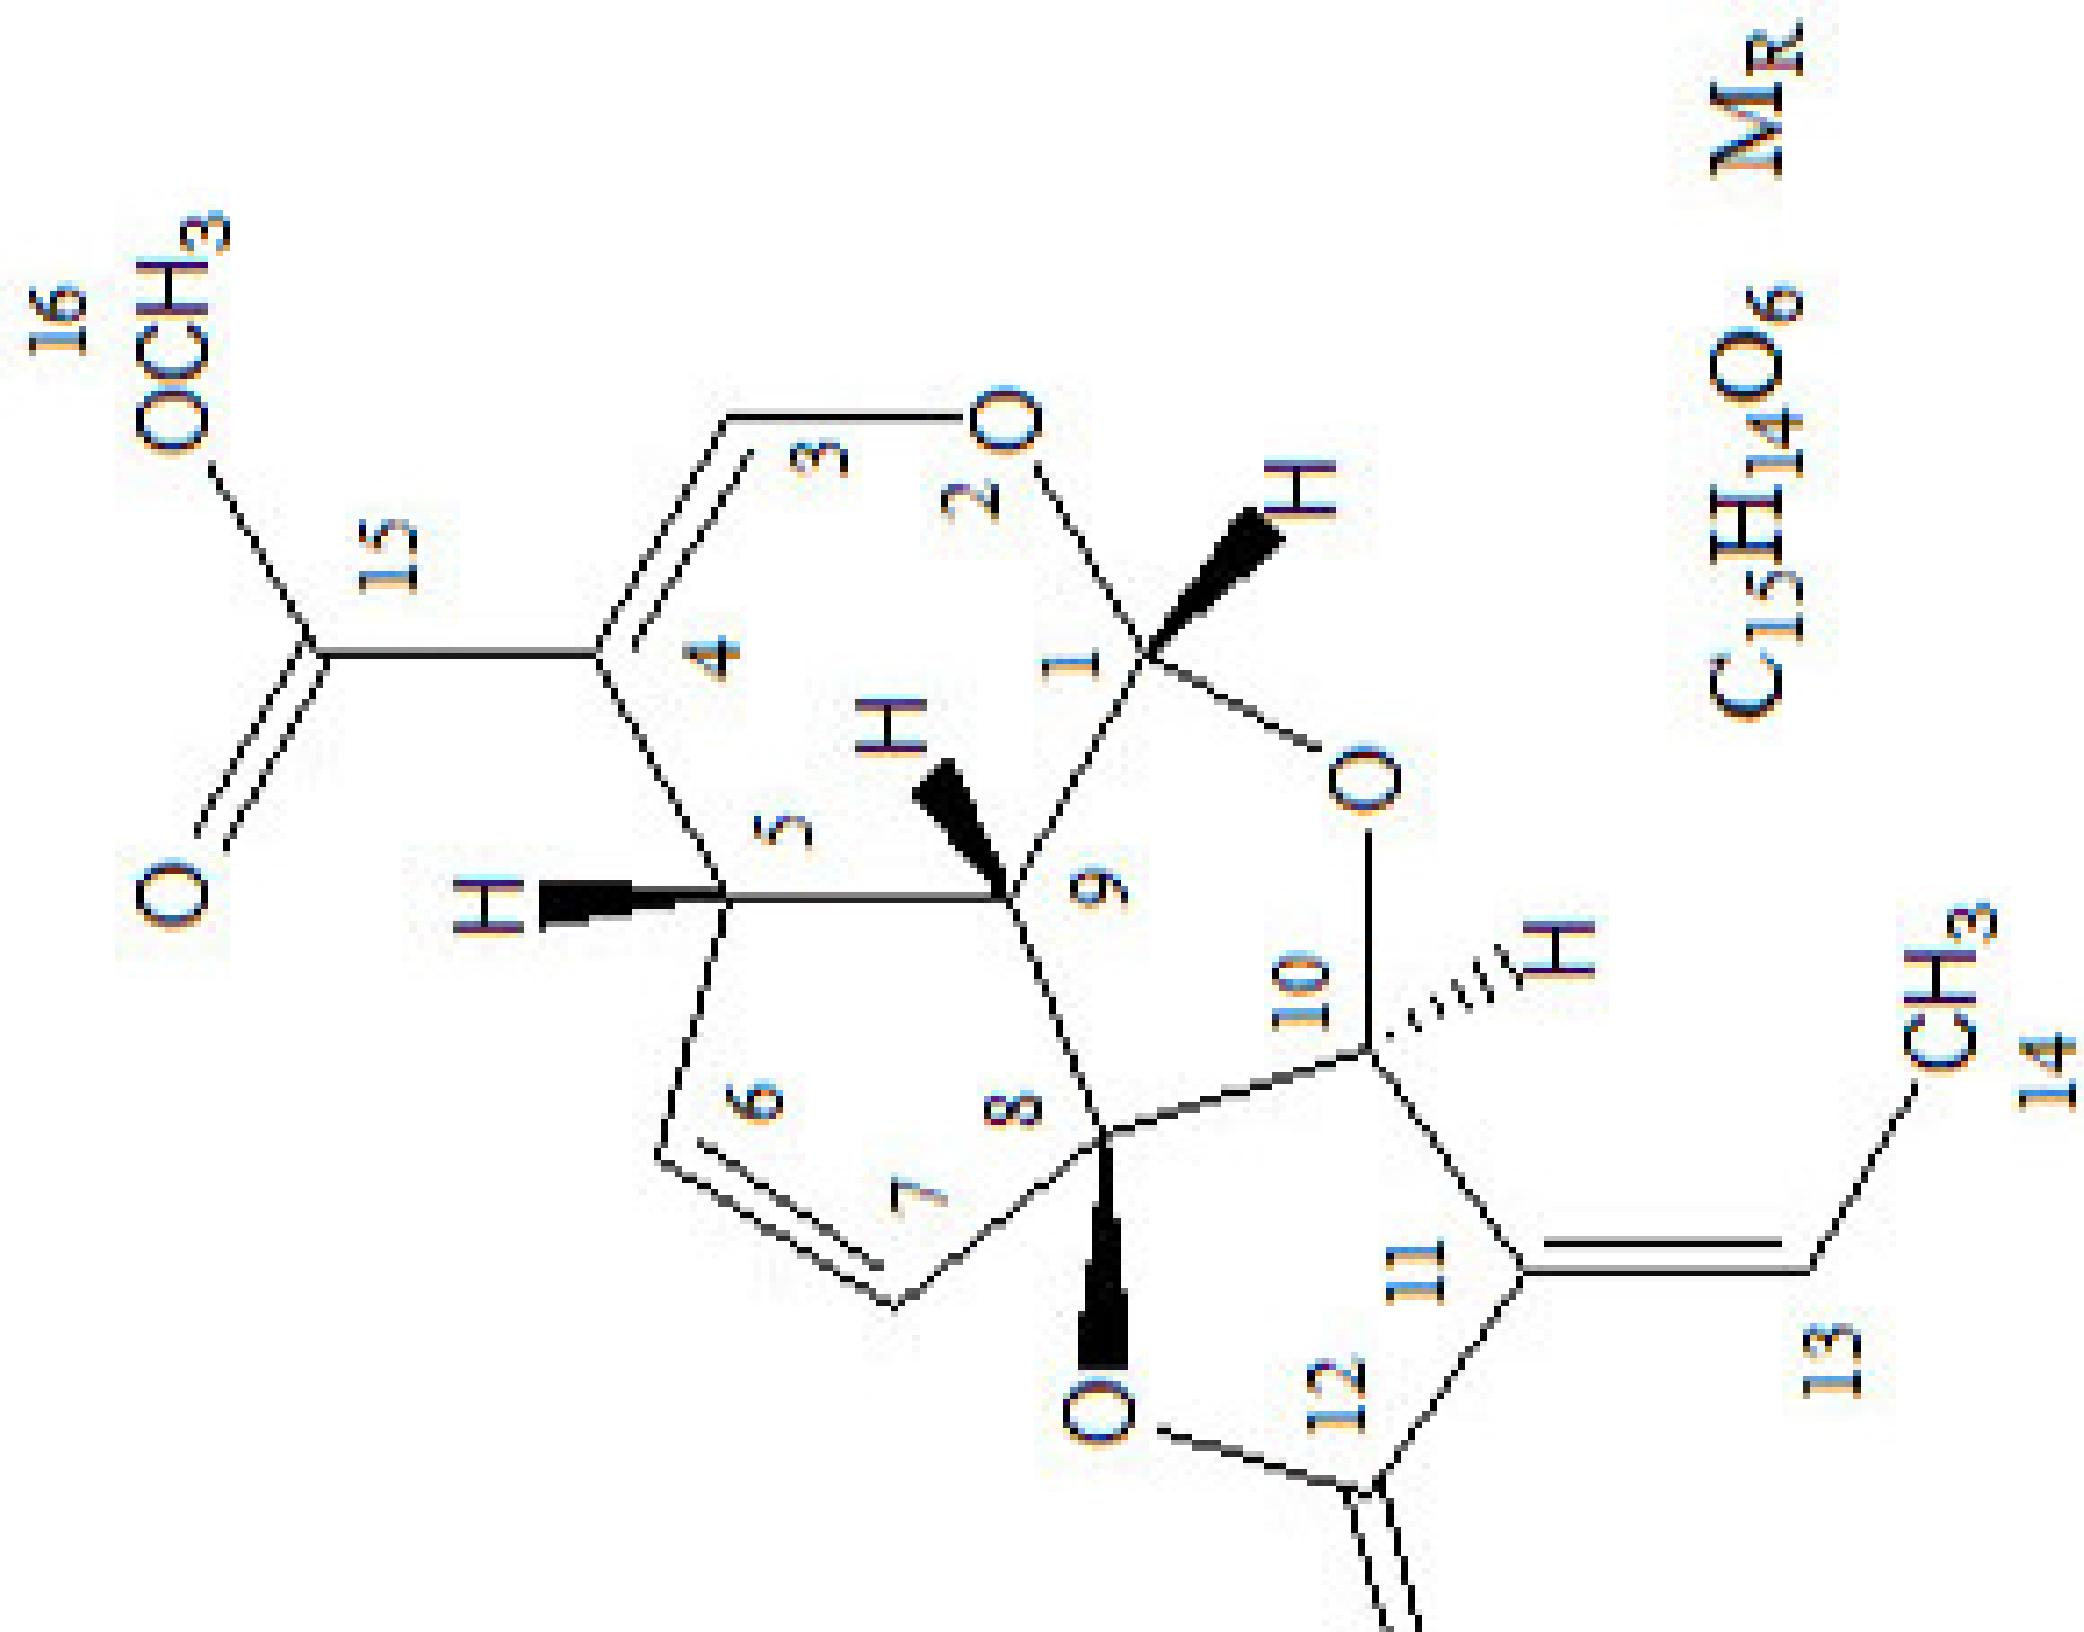

Supplement: f1 [file 823178.f1.pdf]
